# Supplementary material
Source: PubMed Central journal article supplement (PMC3146723)
Supplement: mmc1.pdf [file mmc1.pdf]

## Supplemental Data

### Random-Effects Model Aimed at Discovering Associations in Meta-Analysis of Genome-wide Association Studies

Buhm Han and Eleazar Eskin

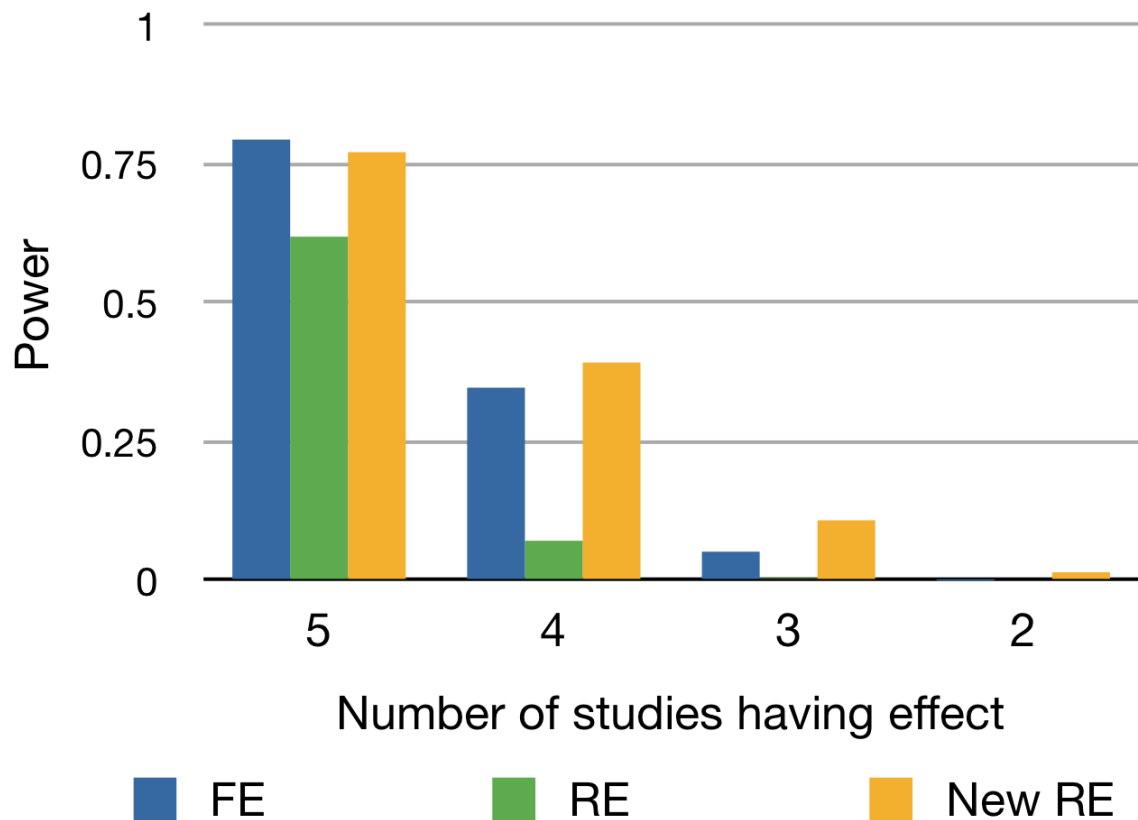

Figure S1:

Power of FE, RE, and our new RE method when the number of studies having effect varies from 5 to 2 among 5 studies in a meta-analysis. We assume equal sample size of 1000. Unlike Figure 5 in the main manuscript, we fixed odds ratio to 1.3 instead of increasing odds ratio as the number of studies having effect decreases. As a result, for each method, the power decreases as the number of studies having effect decreases, as it should.

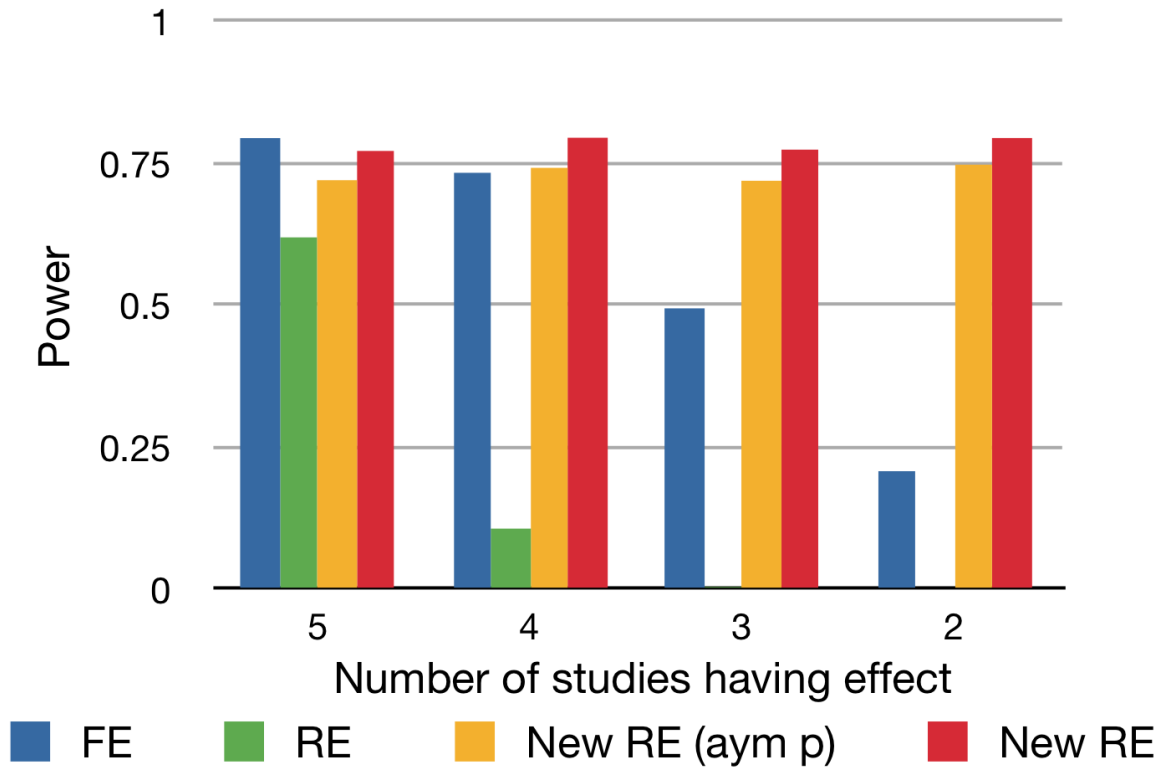

Figure S2:  
 Power of different methods when the number of studies having effect varies from 5 to 2 among 5 studies in a meta-analysis. We assume equal sample size of 1000. Unlike Figure 5 in the main manuscript, we additionally plot the power of New RE method with the p-values estimated using the asymptotic distribution. This shows that a considerable amount of power can be lost using the asymptotic approximation instead of our accurate estimation.

| rsIDs      | Chr | Position    | FE p-value | RE p-value | New RE p-value | I <sup>2</sup> |
|------------|-----|-------------|------------|------------|----------------|----------------|
| rs2797685  | 1   | 7,801,650   | 3.25E-10   | 3.68E-06   | 6.35E-10       | 32.02          |
| rs11209026 | 1   | 67,478,546  | 8.57E-59   | 8.57E-59   | 3.94E-58       | 0              |
| rs2476601  | 1   | 114,179,091 | 8.54E-09   | 6.92E-06   | 1.46E-08       | 22.31          |
| rs1142287  | 1   | 153,496,755 | 1.20E-09   | 7.01E-06   | 1.37E-09       | 37.34          |
| rs4656940  | 1   | 159,096,892 | 1.05E-06   | 6.89E-04   | 6.91E-07       | 57.01          |
| rs7517810  | 1   | 171,120,083 | 9.19E-16   | 9.19E-16   | 2.22E-15       | 0              |
| rs1998598  | 1   | 195,994,265 | 6.13E-09   | 6.13E-09   | 1.12E-08       | 0              |
| rs7554511  | 1   | 199,144,185 | 2.81E-07   | 5.22E-07   | 4.00E-07       | 2.82           |
| rs3024505  | 1   | 205,006,527 | 7.03E-09   | 5.30E-05   | 5.50E-09       | 46.49          |
| rs13428812 | 2   | 25,345,971  | 4.01E-08   | 4.01E-08   | 7.39E-08       | 0              |
| rs780093   | 2   | 27,596,107  | 1.13E-04   | 5.95E-02   | 2.78E-05       | 61.85          |
| rs10495903 | 2   | 43,660,422  | 7.59E-08   | 7.59E-08   | 1.40E-07       | 0              |
| rs10181042 | 2   | 61,077,763  | 7.28E-09   | 7.28E-09   | 1.33E-08       | 0              |
| rs2058660  | 2   | 102,420,881 | 1.45E-12   | 1.45E-12   | 3.13E-12       | 0              |
| rs6738825  | 2   | 198,605,140 | 2.05E-07   | 2.05E-07   | 3.72E-07       | 0              |
| rs7423615  | 2   | 230,825,118 | 8.80E-09   | 5.00E-07   | 1.17E-08       | 21.14          |
| rs3792109  | 2   | 233,849,156 | 2.45E-40   | 3.38E-32   | 9.36E-40       | 12.81          |
| rs13073817 | 3   | 18,681,862  | 8.99E-07   | 1.71E-04   | 1.59E-06       | 36.71          |
| rs3197999  | 3   | 49,696,536  | 3.40E-17   | 3.40E-17   | 8.60E-17       | 0              |
| rs11742570 | 5   | 40,446,341  | 1.62E-35   | 6.48E-16   | 3.93E-35       | 49.11          |
| rs7702331  | 5   | 72,586,890  | 3.61E-06   | 3.82E-04   | 6.12E-06       | 43.55          |
| rs2549794  | 5   | 96,270,305  | 4.35E-11   | 2.78E-07   | 7.64E-11       | 24.21          |
| rs12521868 | 5   | 131,812,292 | 8.29E-21   | 2.07E-15   | 2.30E-20       | 19.91          |
| rs11167764 | 5   | 141,459,249 | 1.51E-09   | 6.03E-09   | 2.86E-09       | 3.93           |
| rs7714584  | 5   | 150,250,613 | 1.32E-18   | 3.40E-14   | 2.55E-18       | 23.32          |
| rs6556412  | 5   | 158,719,963 | 1.93E-13   | 2.26E-07   | 3.71E-13       | 39.85          |
| rs359457   | 5   | 173,212,448 | 5.33E-08   | 2.58E-07   | 9.70E-08       | 7.28           |
| rs17309827 | 6   | 3,378,317   | 5.62E-06   | 1.00E-04   | 4.99E-06       | 22.98          |
| rs6908425  | 6   | 20,836,710  | 1.36E-08   | 1.36E-08   | 2.40E-08       | 0              |
| rs1799964  | 6   | 31,650,287  | 4.55E-11   | 4.55E-11   | 9.23E-11       | 0              |
| rs1847472  | 6   | 91,029,880  | 4.10E-06   | 3.07E-05   | 7.21E-06       | 14.32          |
| rs6568421  | 6   | 106,541,718 | 4.78E-07   | 4.78E-07   | 8.40E-07       | 0              |
| rs212388   | 6   | 159,410,424 | 5.20E-07   | 5.20E-07   | 9.18E-07       | 0              |
| rs415890   | 6   | 167,326,623 | 3.26E-12   | 5.25E-08   | 3.65E-12       | 42.31          |
| rs1456896  | 7   | 50,275,007  | 1.28E-07   | 1.06E-06   | 2.27E-07       | 6.11           |
| rs4871611  | 8   | 126,606,752 | 1.39E-12   | 1.39E-12   | 3.01E-12       | 0              |
| rs6651252  | 8   | 129,636,363 | 3.26E-06   | 1.29E-05   | 5.24E-06       | 11.16          |
| rs10758669 | 9   | 4,971,602   | 4.84E-13   | 4.84E-13   | 1.07E-12       | 0              |
| rs3810936  | 9   | 116,592,706 | 2.64E-14   | 2.64E-14   | 6.10E-14       | 0              |
| rs4077515  | 9   | 138,386,317 | 5.41E-18   | 1.28E-13   | 1.40E-17       | 19.62          |
| rs12722489 | 10  | 6,142,018   | 1.09E-05   | 1.09E-05   | 1.89E-05       | 0              |
| rs12242110 | 10  | 35,575,701  | 1.73E-09   | 1.73E-09   | 3.27E-09       | 0              |
| rs1819658  | 10  | 59,583,157  | 2.30E-07   | 2.30E-07   | 4.17E-07       | 0              |
| rs10761659 | 10  | 64,115,570  | 3.67E-21   | 4.30E-13   | 1.03E-20       | 29.94          |
| rs1250550  | 10  | 80,730,323  | 1.24E-09   | 1.94E-05   | 2.03E-09       | 40.3           |
| rs4409764  | 10  | 101,274,227 | 9.32E-20   | 9.32E-20   | 2.52E-19       | 0              |

|            |    |            |          |          |          |       |
|------------|----|------------|----------|----------|----------|-------|
| rs102275   | 11 | 61,314,379 | 7.10E-08 | 1.03E-07 | 1.30E-07 | 1.73  |
| rs7927997  | 11 | 75,979,023 | 2.57E-12 | 2.57E-12 | 5.50E-12 | 0     |
| rs11564258 | 12 | 39,078,567 | 8.03E-21 | 1.32E-10 | 1.99E-20 | 41.59 |
| rs2062305  | 13 | 41,950,880 | 2.80E-06 | 2.80E-06 | 4.95E-06 | 0     |
| rs3764147  | 13 | 43,355,925 | 1.99E-10 | 1.99E-10 | 3.94E-10 | 0     |
| rs4902642  | 14 | 68,279,952 | 4.57E-07 | 4.57E-07 | 8.01E-07 | 0     |
| rs8005161  | 14 | 87,542,348 | 1.28E-08 | 9.68E-08 | 2.38E-08 | 5.86  |
| rs17293632 | 15 | 65,229,650 | 6.17E-13 | 2.11E-06 | 3.42E-13 | 52.11 |
| rs151181   | 16 | 28,398,018 | 3.32E-10 | 3.81E-06 | 3.09E-10 | 35.22 |
| rs2076756  | 16 | 49,314,382 | 6.61E-72 | 4.58E-44 | 3.10E-71 | 34.15 |
| rs3091315  | 17 | 29,617,778 | 2.25E-13 | 2.25E-13 | 5.01E-13 | 0     |
| rs2872507  | 17 | 35,294,289 | 1.64E-09 | 1.64E-09 | 3.09E-09 | 0     |
| rs11871801 | 17 | 37,824,298 | 5.71E-08 | 9.58E-07 | 1.04E-07 | 10.2  |
| rs1893217  | 18 | 12,799,340 | 1.49E-14 | 1.49E-14 | 3.46E-14 | 0     |
| rs740495   | 19 | 1,075,835  | 3.58E-09 | 3.58E-09 | 6.64E-09 | 0     |
| rs12720356 | 19 | 10,330,975 | 1.90E-08 | 1.90E-08 | 3.30E-08 | 0     |
| rs281379   | 19 | 53,906,086 | 1.23E-08 | 1.05E-06 | 1.77E-08 | 28.44 |
| rs4809330  | 20 | 61,820,030 | 2.86E-12 | 2.86E-12 | 6.11E-12 | 0     |
| rs1736020  | 21 | 15,734,423 | 1.82E-11 | 1.82E-11 | 3.76E-11 | 0     |
| rs2838519  | 21 | 44,439,451 | 4.01E-14 | 8.42E-12 | 9.20E-14 | 12.75 |
| rs181359   | 22 | 20,258,641 | 7.91E-13 | 7.91E-13 | 1.73E-12 | 0     |
| rs713875   | 22 | 28,922,487 | 1.01E-08 | 5.67E-05 | 1.76E-08 | 34.64 |
| rs2413583  | 22 | 37,989,719 | 1.10E-09 | 1.10E-09 | 2.09E-09 | 0     |

Table S1:

Application of the three meta-analysis methods to the Crohn's disease meta-analysis results of Franke et al.. The boldface denotes the top p-value among three methods. The results of all 69 SNPs are presented.
